# Supplementary figures and images for: Realtime Glasses-Free 3D Display with Seamless Ultrawide Viewing Range using Deep Learning
Source: Research Square preprint supplement (doi:10.21203/rs.3.rs-6152542/v1), 2025-03-13

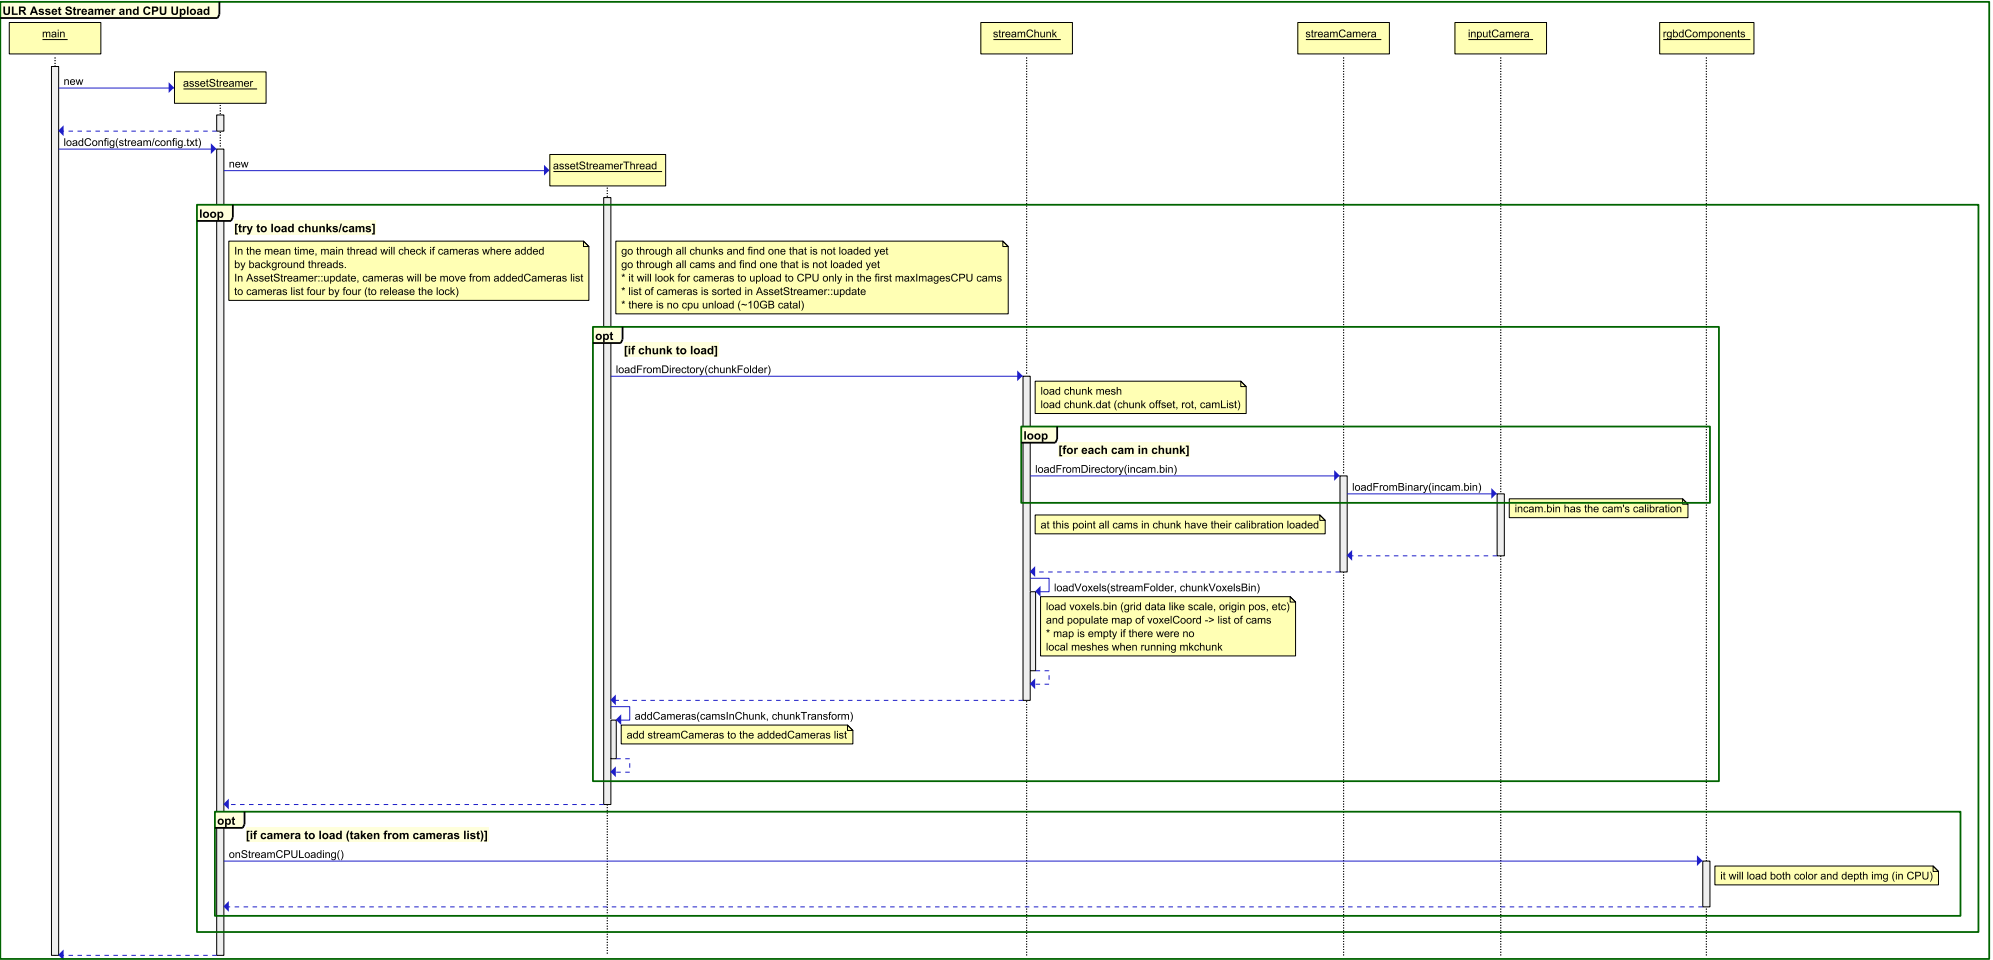

Supplement: Supplementary file 1 [file seq_assetStreamer.pdf › EyeReal/lib/GS/SIBR_viewers/docs/img/diagramas/sequence/AssetStreamer/seq_assetStreamer.pdf]

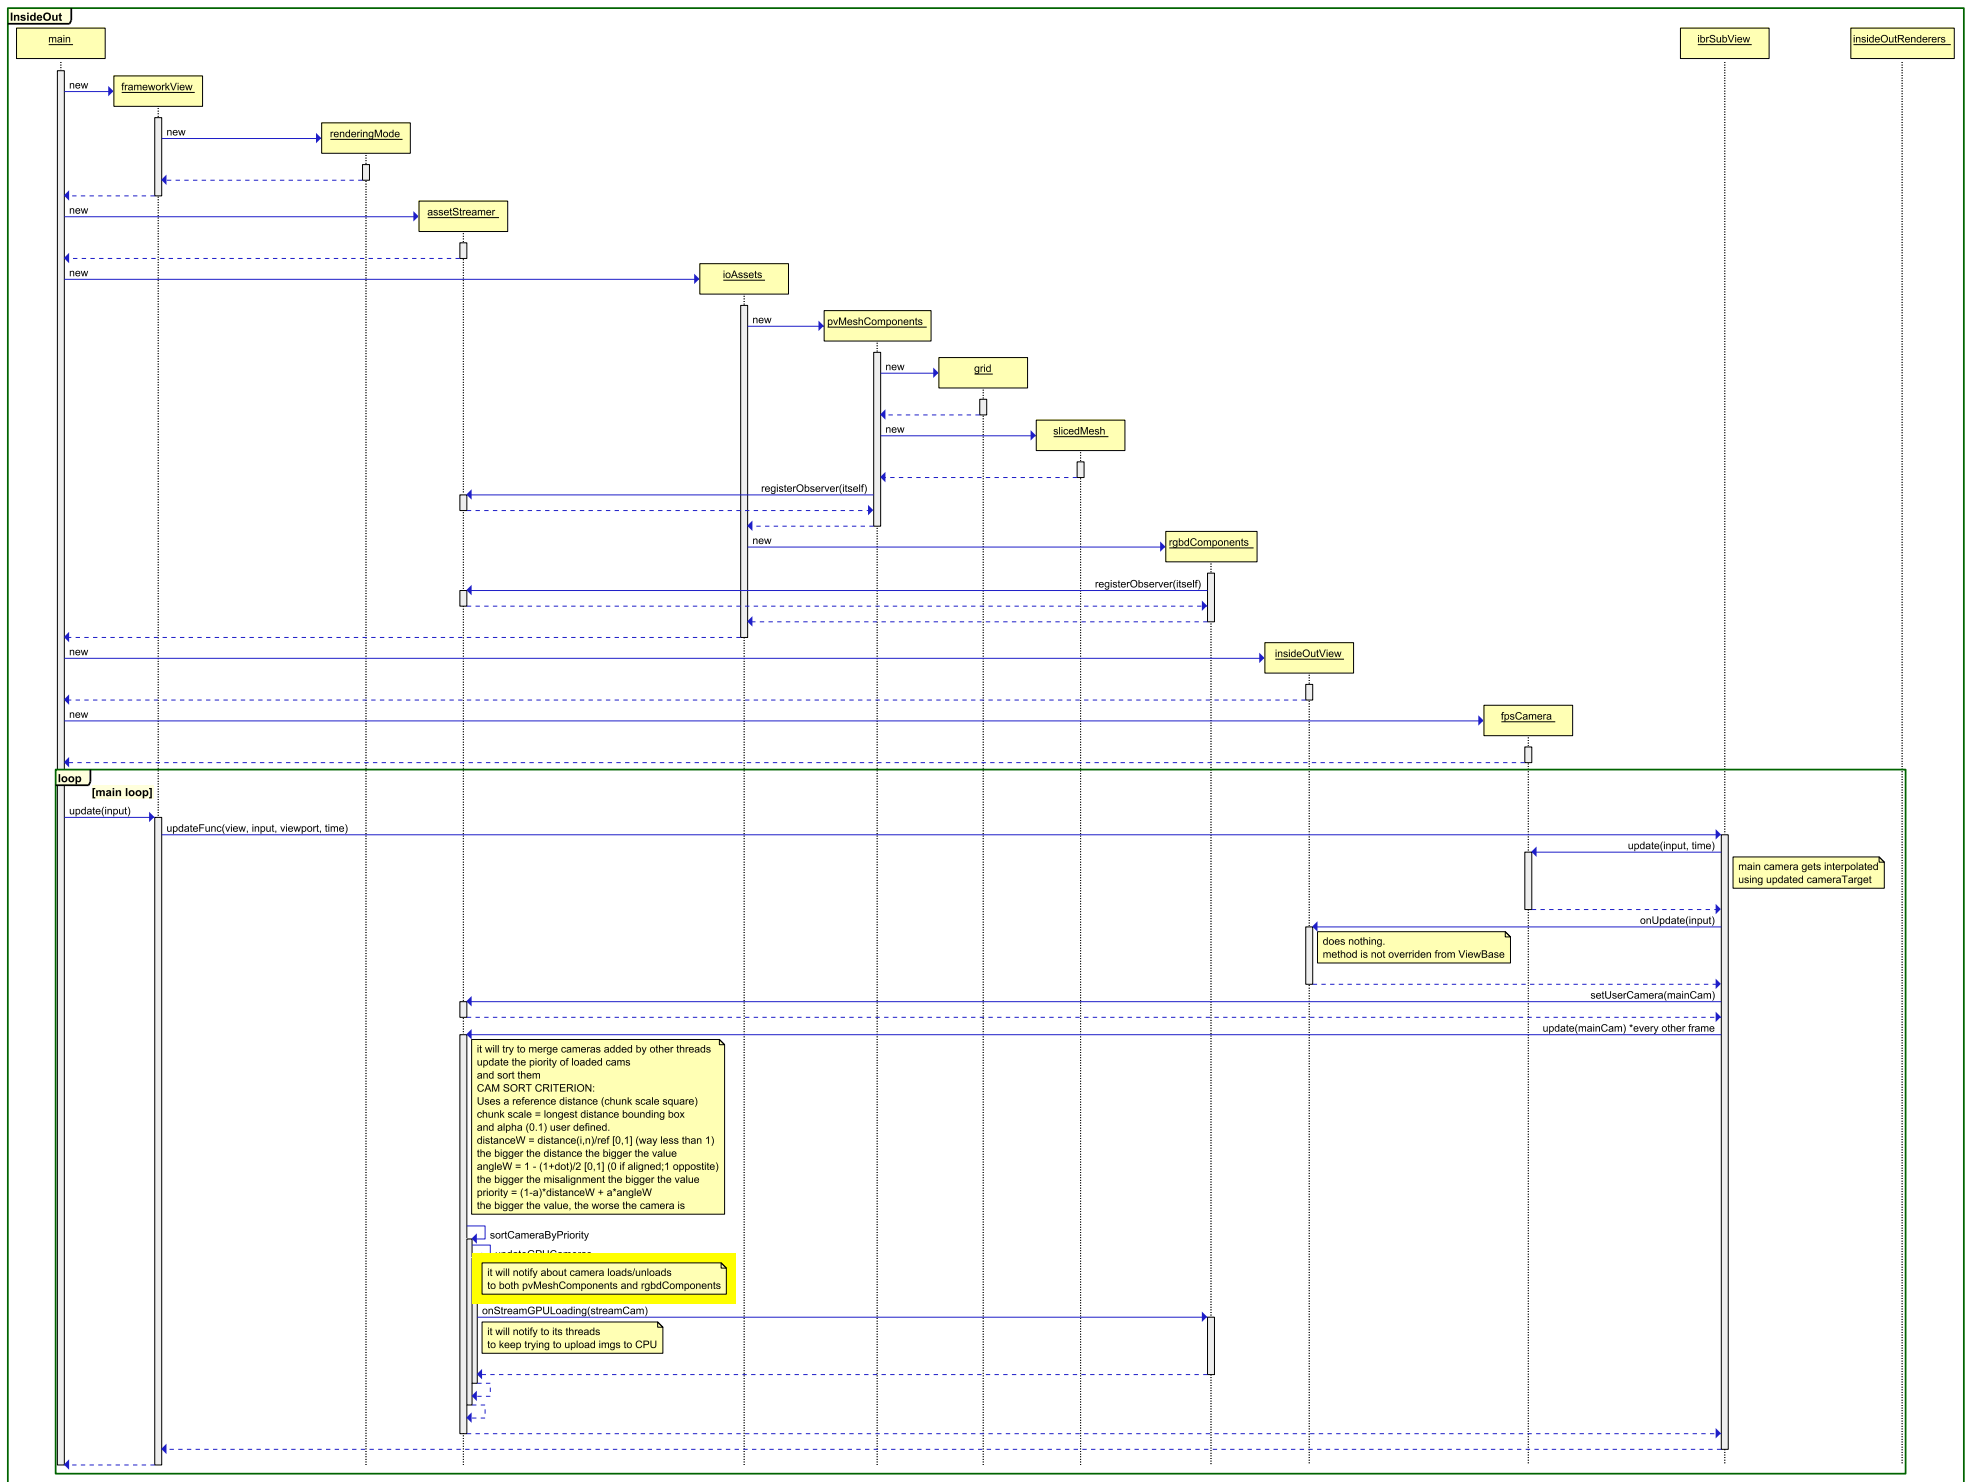

Supplement: Supplementary file 2 [file seq_insideOut.pdf › EyeReal/lib/GS/SIBR_viewers/docs/img/diagramas/sequence/Renderers/seq_insideOut.pdf]

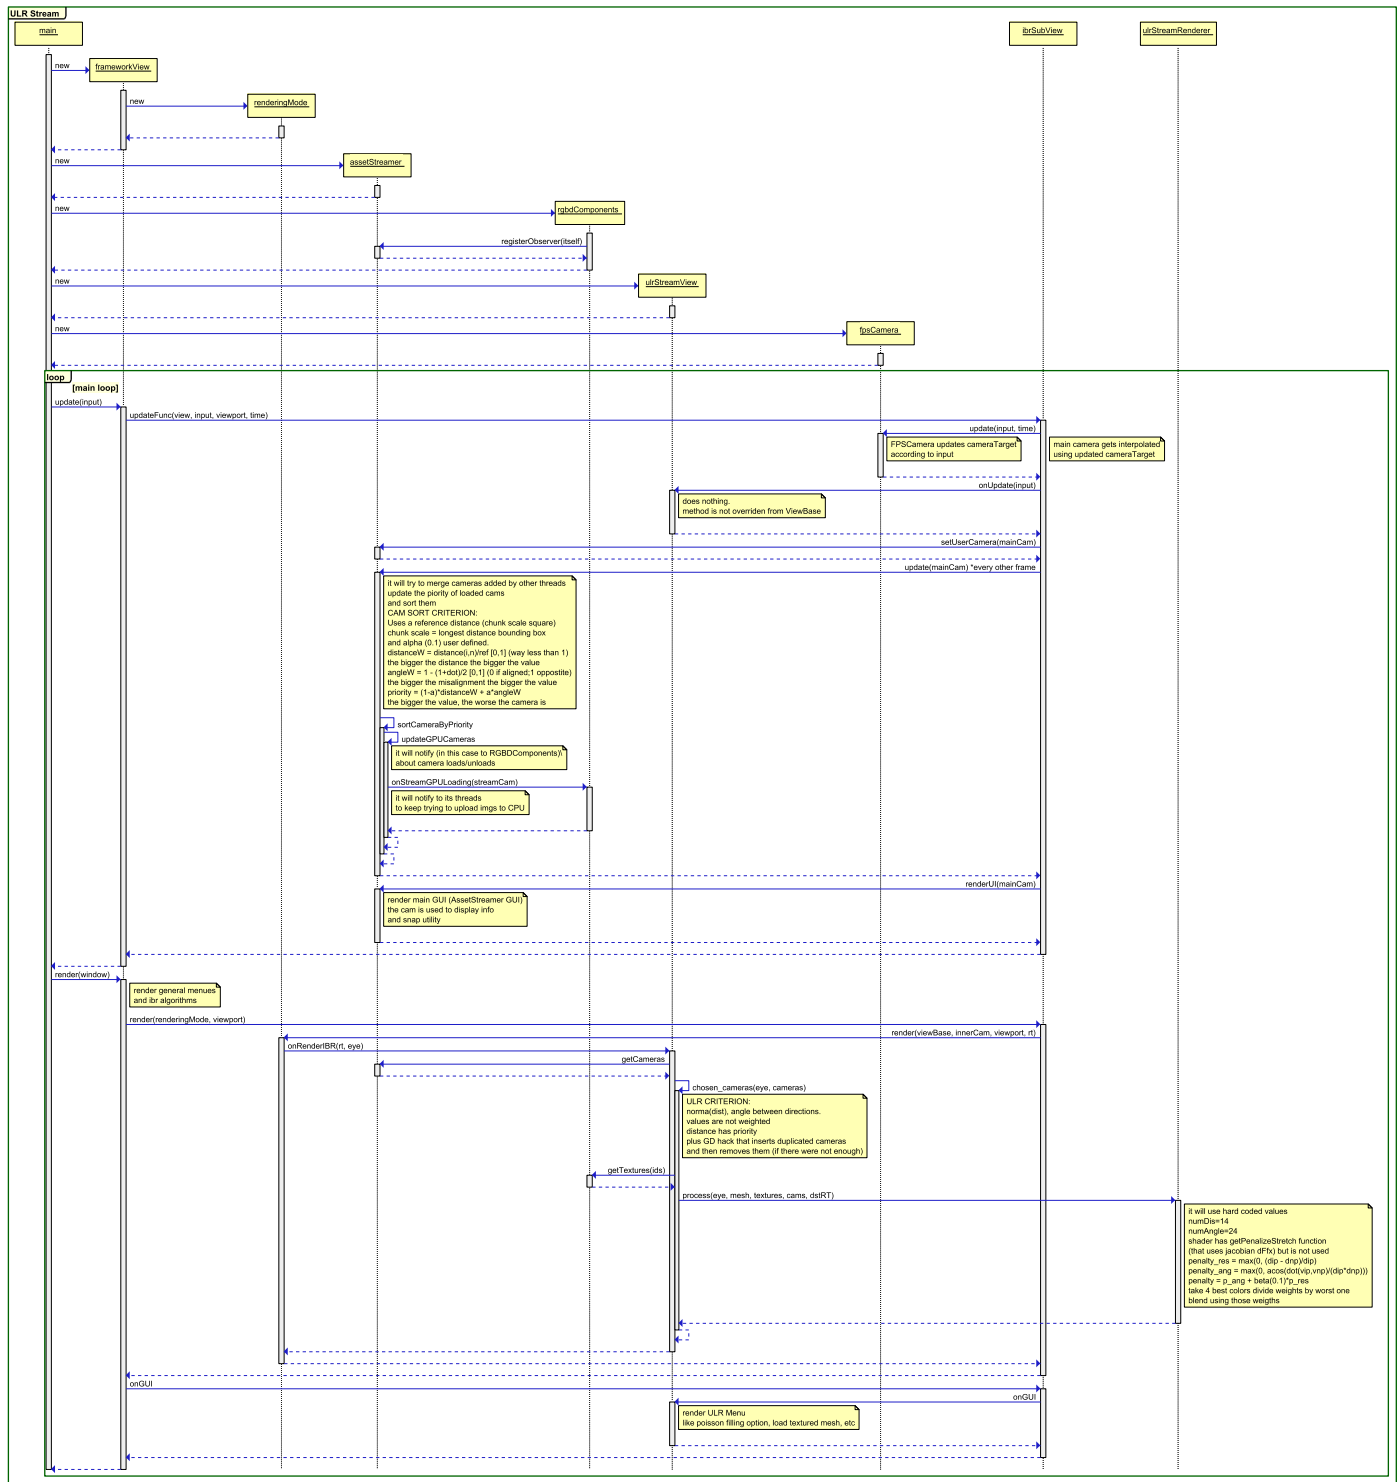

Supplement: Supplementary file 3 [file seq_ulr_stream.pdf › EyeReal/lib/GS/SIBR_viewers/docs/img/diagramas/sequence/Renderers/seq_ulr_stream.pdf]

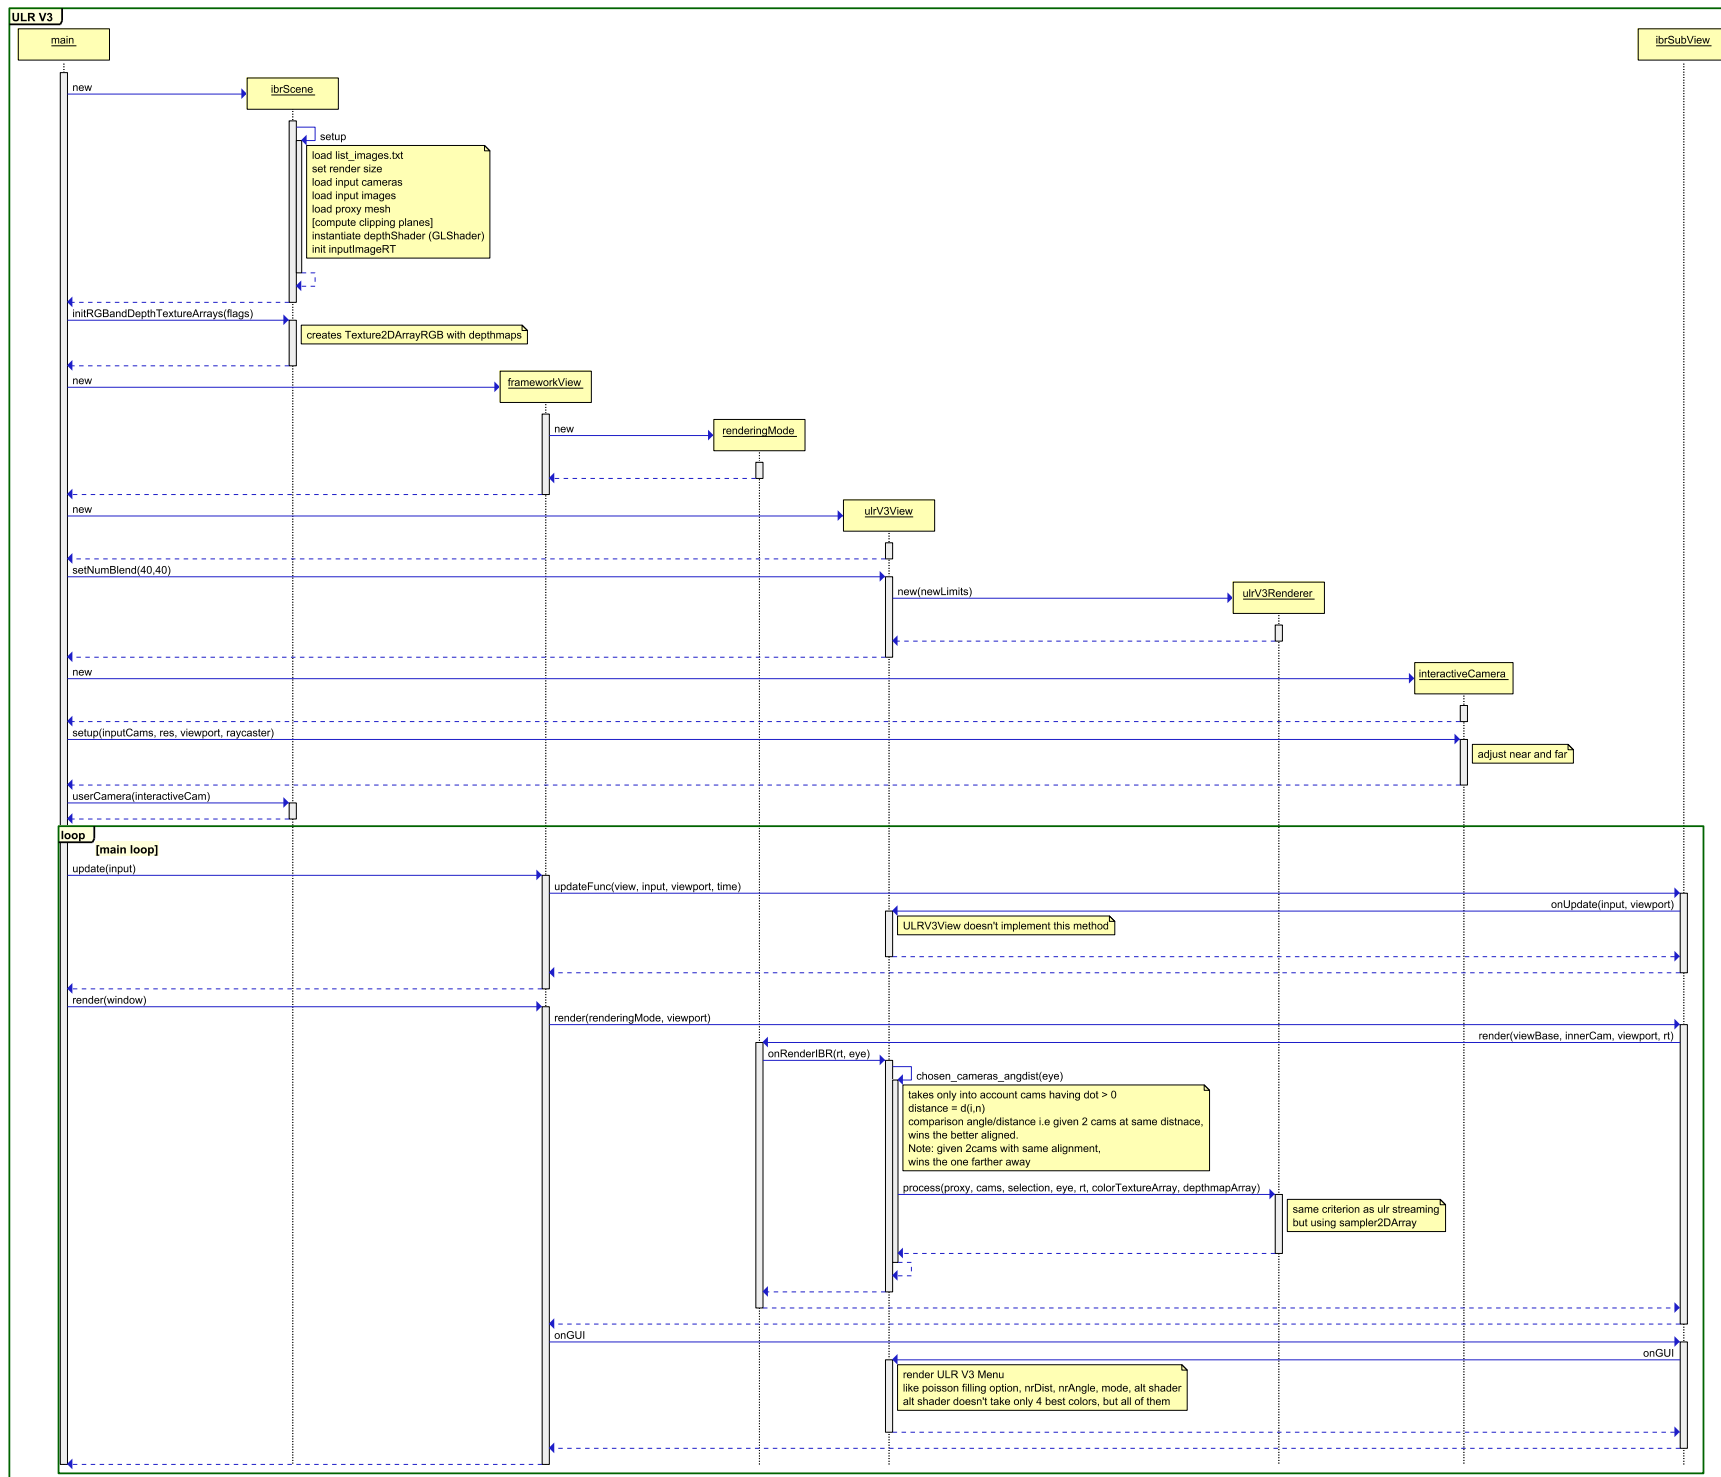

Supplement: Supplementary file 4 [file seq_ulr_v3_landscape.pdf › EyeReal/lib/GS/SIBR_viewers/docs/img/diagramas/sequence/Renderers/seq_ulr_v3_landscape.pdf]

## Unity ULR Rendering

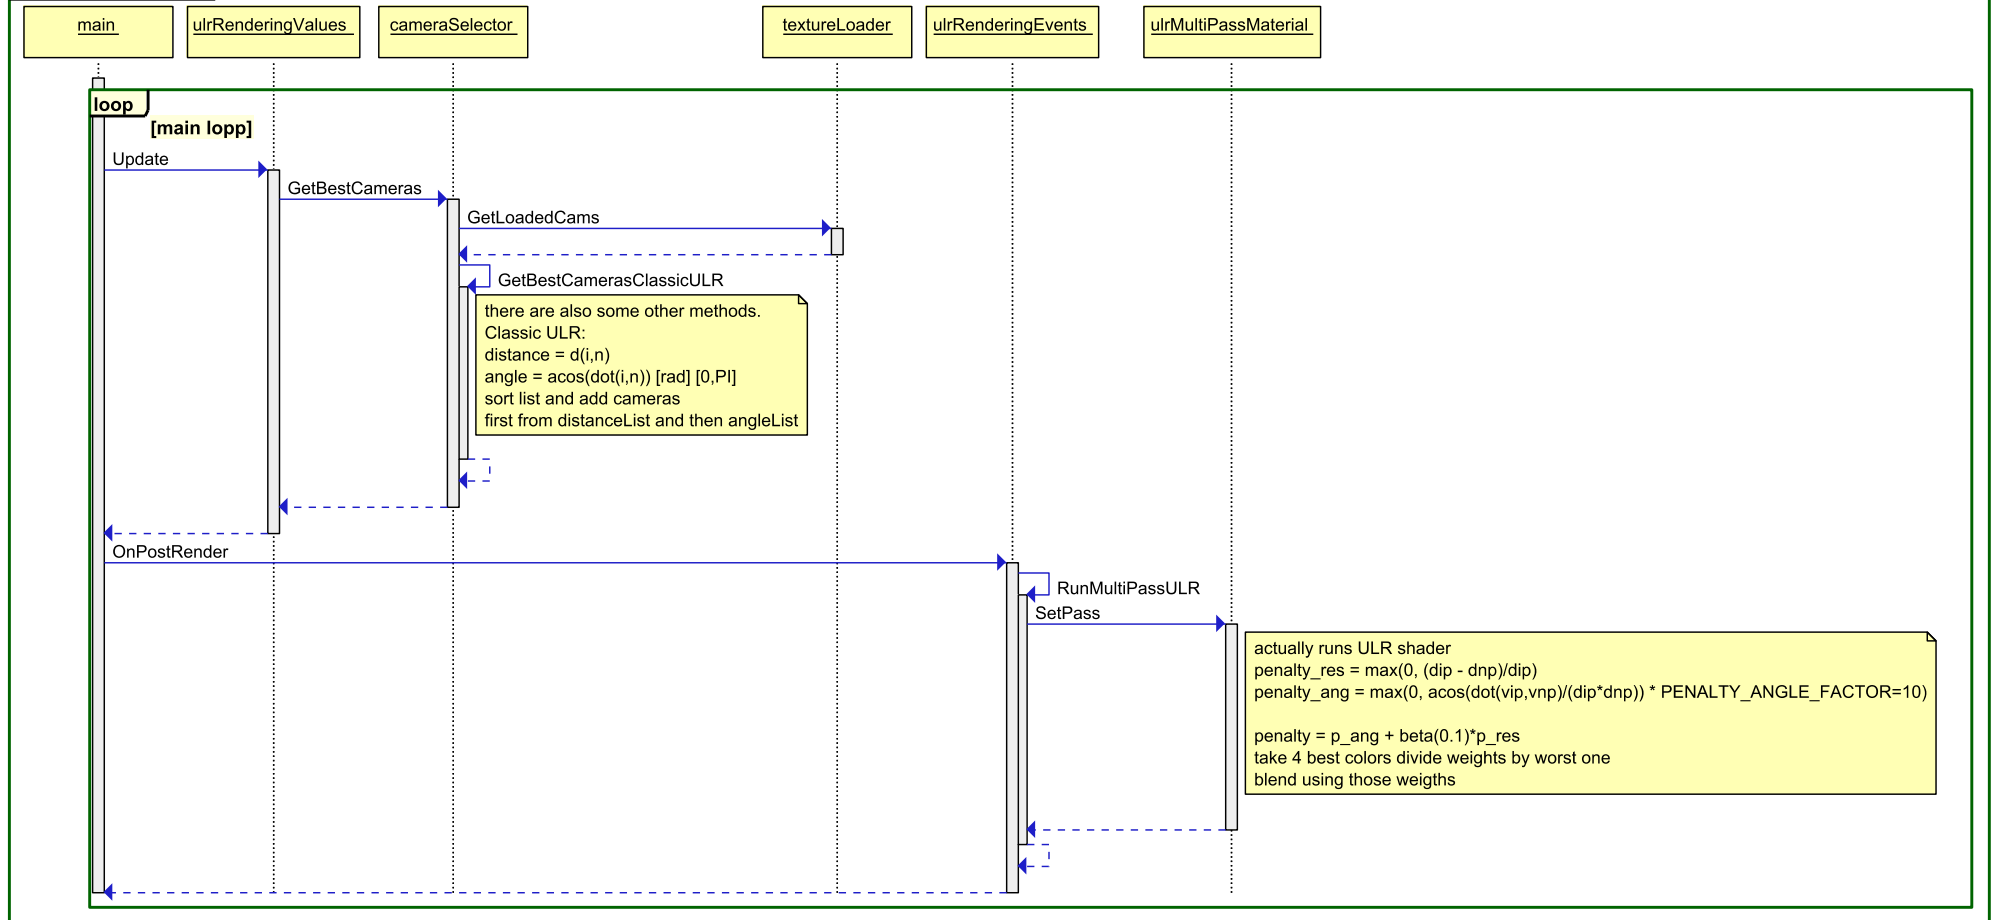

Supplement: Supplementary file 5 [file seq_unity_ulr_rendering.pdf › EyeReal/lib/GS/SIBR_viewers/docs/img/diagramas/sequence/Unity/seq_unity_ulr_rendering.pdf]

# Unity ULR Texture Upload

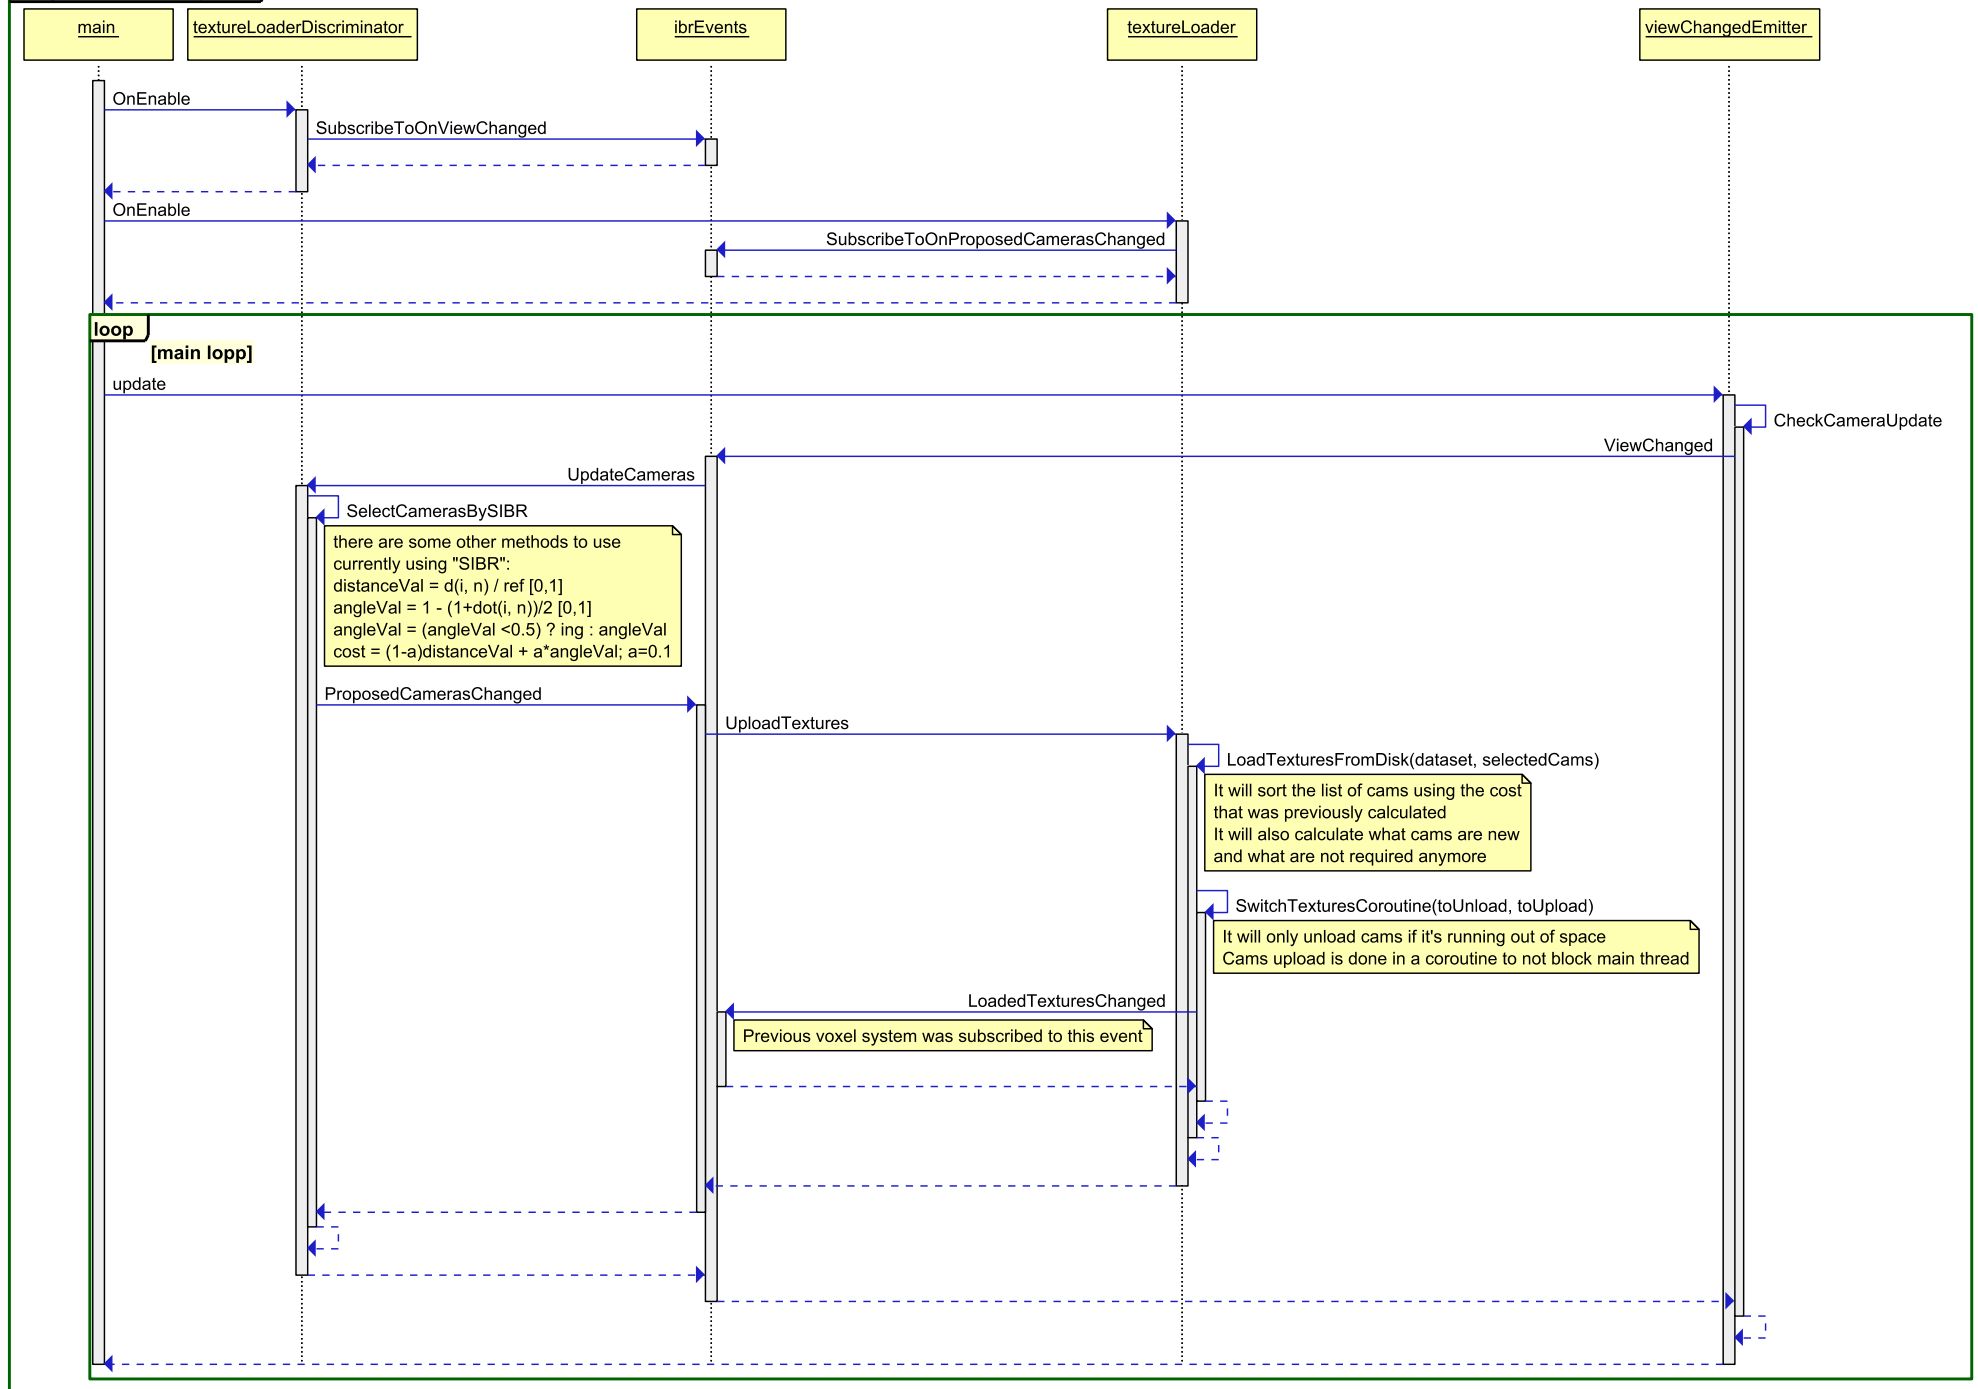

Supplement: Supplementary file 6 [file seq_unity_ulr_texture_upload.pdf › EyeReal/lib/GS/SIBR_viewers/docs/img/diagramas/sequence/Unity/seq_unity_ulr_texture_upload.pdf]
